# Supplementary material for: Activation of metal-bound η5-C5Me5 groups to Diels–Alder addition of 3O2 and other dienophiles
Source: Royal Society of Chemistry journal article supplement (doi:10.1039/b818537a), 2009-01-01
Supplement: b818537a.pdf [file b818537a.pdf]

## **Supplementary Materials**

### **Syntheses, spectroscopic and analytical data for new complexes**

## Syntheses

### Preparation of $\text{Pt}(\eta^1, \eta^2\text{-C}_5\text{Me}_5\text{O}_2)(\text{PR}_3)\text{I}$ , **2**

The complex  $\text{Pt}(\eta^5\text{-C}_5\text{Me}_5)(\text{PR}_3)\text{I}$  (100 mg) was dissolved in 20 ml of distilled hexane/chloroform. The green solution was stirred at room temperature in the air until the green solution turned light yellow (approximately 2 to 3 hours) at which time a white precipitate of product had formed. The solution was stripped off to dryness, the residue dissolved in 2 ml of dichloromethane and hexane was added (10 to 15 ml). Pale yellow crystals were isolated upon refrigeration at  $-30^\circ\text{C}$ . The crystals were washed with hexane and dried *in vacuo*. These crystals were stored in dark at  $-78^\circ\text{C}$ .

### Preparation of $\text{Pt}(\eta^1, \eta^2\text{-C}_5\text{Me}_5\text{dienophile})(\text{PPh}_3)\text{I}$ , **3**

The mixture of hexane (20 ml) and an excess of dienophile was refluxed for 20 minutes under nitrogen gas to remove traces of oxygen. The resulting solution was brought to room temperature. The complex  $\text{Pt}(\eta^5\text{-C}_5\text{Me}_5)(\text{PPh}_3)\text{I}$  (100 mg, 0.139 mmol) was added under flow of nitrogen gas. The resulting mixture was refluxed for 36 (methyl acrylate) to 48 (acrolein, ethyl vinyl ketone) hours. The resulting solution was kept overnight at  $-30^\circ\text{C}$ , the supernatant liquid was decanted and the cream colour crystals dissolved in 2 ml of  $\text{CH}_2\text{Cl}_2$  and hexane (10 to 15 ml) were added. upon refrigeration at  $-30^\circ\text{C}$ . The crystals were washed with hexane and dried *in vacuo*. Yields 70% (acrolein), 85% (methyl acrylate, ethyl vinyl ketone).

Analytical and spectroscopic data for  $\text{Pt}(\eta^1, \eta^2\text{-C}_5\text{Me}_5\text{O}_2)(\text{PR}_3)\text{I}$   
( $\text{PR}_3 = \text{PPh}_3$ , **2a**;  $\text{PR}_3 = \text{PPhCy}_2$ , **2b**;  $\text{PR}_3 = \text{PMe}^t\text{BuPh}$ , **2c**)

**Analyses**

|           |                                                               |         |        |
|-----------|---------------------------------------------------------------|---------|--------|
| <b>2a</b> | calc. for $\text{C}_{28}\text{H}_{30}\text{IO}_2\text{PPt}$   | C 44.75 | H 4.02 |
|           | found:                                                        | C 44.68 | H 4.09 |
| <b>2b</b> | calc. for $\text{C}_{28}\text{H}_{42}\text{IO}_2\text{PPt}$ : | C 44.04 | H 5.54 |
|           | found:                                                        | C 44.03 | H 5.55 |
| <b>2c</b> | calc. for $\text{C}_{27}\text{H}_{32}\text{IO}_2\text{PPt}$ : | C 37.68 | H 4.81 |
|           | found:                                                        | C 37.95 | H 4.88 |

**NMR**

|                                            | <b>2a</b>                 | <b>2b<sup>a</sup></b>       | <b>2c</b>                 |
|--------------------------------------------|---------------------------|-----------------------------|---------------------------|
|                                            | $\text{C}_6\text{D}_6$ RT | $\text{C}_6\text{D}_6$ RT   | $\text{C}_6\text{D}_6$ RT |
| $^{195}\text{Pt}\{^1\text{H}\}^{\text{a}}$ | 420<br>[4585]             | 444 <sup>a</sup><br>[4461]  | 438<br>[4487]             |
| $^{31}\text{P}\{^1\text{H}\}^{\text{a}}$   | 23.3<br>[4584]            | 28.3 <sup>b</sup><br>[4459] | 22.6<br>[4487]            |

[ ]  $J_{\text{PtP}}$ ; a) 457 [4442] in  $\text{CD}_2\text{Cl}_2$ ; b) 27.9 [4443] in  $\text{CD}_2\text{Cl}_2$

| $^{13}\text{C}\{^1\text{H}\}$ | <b>2a</b>             | <b>2b</b>                   | <b>2c</b>                                |
|-------------------------------|-----------------------|-----------------------------|------------------------------------------|
|                               | $\text{CDCl}_3$ 250 K | $\text{CD}_2\text{Cl}_2$ RT | $\text{CDCl}_3$ 230 K                    |
| C(1)                          | 42.3<br>[477]         | 42.0<br>[503]               | 41.5<br>[500]                            |
| C(2)                          | 95.1<br>[66]          | 95.9<br>[69]<br>{4}         | 95.3<br>[66]                             |
| C(3)                          | 113.5<br>[77]<br>{14} | 113.2<br>[78]<br>{13}       | 114.0, 111.6<br>[72], [78]<br>{12}, {13} |
| Me(1)                         | 7.6<br>{5}            | 9.1<br>{4}                  | 6.8<br>{3}                               |
| Me(2)                         | 9.6<br>[16]           | 10.7<br>[17]                | 9.7, 9.9<br>[unobs], [unobs]             |
| Me(3)                         | 13.2<br>[unobs]       | 13.3<br>[11]                | 12.9, 12.7<br>[17], [16]                 |
| Ph                            | 128.1 {11}            | 126.2 {47} [69]             | 127.8 {10}                               |
|                               | 129.2 {58}            | 128.2 {10}                  | 129.8 {50} [44]                          |
|                               | 130.8                 | 131.2                       | 130.7                                    |
|                               | 133.8 {11}            | 134.0 {8} [34]              | 132.5 {11} [26]                          |
| Cy                            |                       | 26.5                        |                                          |
|                               |                       | 26.7 {10}, 26.9 {10}        |                                          |
|                               |                       | 28.9 [15], 29.5 [15]        |                                          |
|                               |                       | 4.5 {28} [32]               |                                          |
| Bu <sup>t</sup>               |                       |                             | 26.0                                     |
|                               |                       |                             | 32.3 {31} [62]                           |
| Me                            |                       |                             | 8.3<br>[43]<br>{33}                      |

{ } J<sub>PC</sub>, [ ] J<sub>PtC</sub>

| <sup>1</sup> H  | <b>2a</b>               | <b>2b</b>                          | <b>2c</b>                                    |
|-----------------|-------------------------|------------------------------------|----------------------------------------------|
|                 | CDCl <sub>3</sub> RT    | CD <sub>2</sub> Cl <sub>2</sub> RT | CDCl <sub>3</sub> RT                         |
| Me(1)           | 0.29<br>[59.3]<br>{1.5} | 0.39<br>[61.5]<br>{0.9}            | 0.11<br>[60.5]<br>{1.3}                      |
| Me(2)           | 1.32                    | 1.34                               | 1.20, 1.35                                   |
| Me(3)           | 2.05<br>[29.4]<br>{2.8} | 1.97<br>[27.7]<br>{3.0}            | 1.89, 1.94<br>[33.5], [25.0]<br>{2.6}, {3.4} |
| Ph              | 7.32-7.81               | 7.40-7.50                          | 7.37-7.64                                    |
| Cy              |                         | 1.00-2.80                          |                                              |
| Bu <sup>t</sup> |                         |                                    | 1.29<br>{15.6}                               |
| Me              |                         |                                    | 1.87<br>{9.1}<br>[48.3]                      |

{ } J<sub>PC</sub>, [ ] J<sub>PtC</sub>

Analytical and spectroscopic data for [Pt( $\eta^1$ ,  $\eta^2$ -C<sub>5</sub>Me<sub>5</sub>CH<sub>2</sub>CHR)(PPh<sub>3</sub>)I]  
(R = CHO, **3a**; R = CO<sub>2</sub>Me, **3b**; R = C(O)Et, **3c**)

Analyses

|           |                                                                |         |        |
|-----------|----------------------------------------------------------------|---------|--------|
| <b>3a</b> | calc. for C <sub>28</sub> H <sub>34</sub> IOPPt:               | C 48.01 | H 4.42 |
|           | found:                                                         | C 47.79 | H 4.61 |
| <b>3b</b> | calc. for C <sub>32</sub> H <sub>36</sub> IO <sub>2</sub> PPt: | C 47.71 | H 4.50 |
|           | found:                                                         | C 48.31 | H 4.56 |
| <b>3c</b> | calc. for C <sub>33</sub> H <sub>38</sub> IOPPt:               | C 49.32 | H 4.77 |
|           | found:                                                         | C 49.38 | H 4.76 |

| NMR Data                                                            | <b>3a</b>                                            |                                 | <b>3b</b>                                            |                | <b>3c</b>                                            |                             |
|---------------------------------------------------------------------|------------------------------------------------------|---------------------------------|------------------------------------------------------|----------------|------------------------------------------------------|-----------------------------|
|                                                                     | major                                                | minor                           | major                                                | minor          | major                                                | minor                       |
|                                                                     | 85%                                                  | 15%                             | >95%                                                 | <5%            | >95%                                                 | <8%                         |
| <sup>195</sup> Pt{ <sup>1</sup> H} (C <sub>6</sub> D <sub>6</sub> ) | 730<br>[4619]                                        | 725<br>[4566]                   | 719<br>[4587]                                        |                | 717<br>[4594]                                        | 742<br>[4578]               |
| <sup>31</sup> P{ <sup>1</sup> H} (C <sub>6</sub> D <sub>6</sub> )   | 18.8<br>[4617]                                       | 19.8<br>[4563]                  | 19.9<br>[4588]                                       | 21.4<br>[4579] | 18.8<br>[4594]                                       |                             |
| <sup>1</sup> H (CDCl <sub>3</sub> )                                 |                                                      |                                 |                                                      |                |                                                      |                             |
| Me(1)                                                               | -0.17 (d)<br>[63.5]<br>{1.5}                         | -0.13 (d)<br>[63.5]<br>{1.9}    | -0.19 (d)<br>[64.0]<br>{1.3}                         |                | -0.17 (d)<br>[63.4]<br>{1.4}                         | 0.05 (d)<br>[unobs]<br>{~2} |
| Me(2)                                                               | 1.36, 1.53                                           | 1.35, 1.41                      | 1.33, 1.47                                           |                | 1.34, 1.49                                           |                             |
| Me(3)                                                               | 1.83 (d), 1.94 (d)<br>[28.3], [~ 22]<br>{3.3}, {3.3} | 1.89 (×2) (d)<br>[~33]<br>{4.2} | 1.81 (d), 1.98 (d)<br>[36.6], [30.8]<br>{3.2}, {3.3} |                | 1.77 (d), 2.00 (d)<br>[37.0], [29.6]<br>{3.2}, {3.3} |                             |
| H(a)                                                                | 2.53 (d of d of d)                                   | -                               | 2.46 (d of d)                                        |                | 2.74 (d of d)                                        |                             |

|                      |                                                                 |                                   |                                        |          |                                                                              |  |
|----------------------|-----------------------------------------------------------------|-----------------------------------|----------------------------------------|----------|------------------------------------------------------------------------------|--|
|                      | $J(H_aH_b) = 4.9$<br>$J(H_aH_c) = 9.4$<br>$J(H_aH_{CHO}) = 3.1$ |                                   | $J(H_aH_b) = 4.9$<br>$J(H_aH_c) = 9.7$ |          | $J(H_aH_b) = 5.2$<br>$J(H_aH_c) = 9.5$                                       |  |
| H(b)                 | 1.26 (d of d)<br>$J(H_bH_c) = 13.3$                             | -                                 | 1.27 (d of d)<br>$J(H_bH_c) = 12.9$    |          | 1.22 (d of d)<br>$J(H_bH_c) = 12.7$                                          |  |
| H(c)                 | 1.49 (d of d)                                                   | -                                 | 1.55 (d of d)                          |          | 1.47 (d of d)                                                                |  |
| HC(O)                | 9.53 (d)                                                        | 9.42 (d)<br>$J(H_aH_{CHO}) = 3.4$ |                                        |          |                                                                              |  |
| CH <sub>3</sub> C(O) |                                                                 |                                   | 3.61 (s)                               | 3.56 (s) |                                                                              |  |
| Ph                   | 7.1-7.8 (m)                                                     |                                   | 7.1-7.8 (m)                            |          | 7.2-7.8 (m)                                                                  |  |
| CH <sub>2</sub>      |                                                                 |                                   |                                        |          | 2.32, 2.48<br>$J(AB) = 18.0$<br>$J(H_AH_{Me}) = 7.2$<br>$J(H_BH_{Me}) = 7.2$ |  |
| CH <sub>3</sub>      |                                                                 |                                   |                                        |          | 0.97 ("t")                                                                   |  |

| $^{13}\text{C}\{^1\text{H}\}$ ( $\text{CDCl}_3$ ) |                                                |       |                                          |  |                                          |  |
|---------------------------------------------------|------------------------------------------------|-------|------------------------------------------|--|------------------------------------------|--|
| C(1)                                              | 36.8<br>[unobs]<br>{4}                         |       | 36.6<br>[468]<br>{4}                     |  | 32.9<br>[unobs]<br>{unobs}               |  |
| C(2)                                              | 63.8, 68.1<br>[88], [84]                       |       | 63.2, 67.4<br>[88], [84]                 |  | 63.6, 68.2<br>[90], [83]                 |  |
| C(3)                                              | 109.5, 114.3<br>[unobs], [unobs]<br>{17}, {14} |       | 110.0, 113.8<br>[73], [68]<br>{15}, {15} |  | 111.5, 114.2<br>[69], [65]<br>{15}, {16} |  |
| Me(1)                                             | 9.2<br>{5}                                     |       | 8.9<br>{6}                               |  | 9.4<br>{5}                               |  |
| Me(2)                                             | 15.0, 15.5<br>[34], [35]                       |       | 14.4, 15.2<br>[32], [34]                 |  | 15.6, 15.7<br>[32], [35]                 |  |
| Me(3)                                             | 13.7, 16.4<br>[15], [18]                       |       | 13.5, 15.5<br>[17], [17]<br>{3}, {2}     |  | 13.9, 16.5<br>[14], [16]<br>{3}, {3}     |  |
| $\text{CH}_2$                                     | 37.2<br>[113]                                  |       | 39.9<br>[110]                            |  | 40.8<br>[108]                            |  |
| CH                                                | 62.0<br>[104]                                  |       | 52.6<br>[111]                            |  | 60.2<br>[100]                            |  |
| C(O)                                              | 202.2                                          | 202.0 | 173.4                                    |  | 211.7                                    |  |
| Me                                                |                                                |       | 51.2                                     |  |                                          |  |
| $\text{CH}_2$                                     |                                                |       |                                          |  | 38.0                                     |  |

|                                 |                   |  |                 |  |                 |  |
|---------------------------------|-------------------|--|-----------------|--|-----------------|--|
|                                 |                   |  |                 |  |                 |  |
| CH <sub>2</sub> CH <sub>3</sub> |                   |  |                 |  | 10.1            |  |
| Ph                              | 128.0 {11}        |  | 127.1 {11}      |  | 128.0 {11}      |  |
|                                 | 130.4             |  | 130.1           |  | 130.3           |  |
|                                 | 131.7 [unob] {57} |  | 131.5 [43] {57} |  | 131.9 [42] {56} |  |
|                                 | 134.5 {11}        |  | 134.2 {11}      |  | 134.5 {12}      |  |
